# Supplementary material for: A ribozyme that uses lanthanides as cofactor
Source: PubMed Central journal article supplement (PMC10415125; doi:10.1093/nar/gkad513), 2023-06-16
Supplement: gkad513_supplemental_file.pdf [file gkad513_supplemental_file.pdf]

## Supplementary Figures

### A Ribozyme that uses Lanthanides as Cofactor

Kevin J. Sweeney, Xu Han, and Ulrich F. Müller

**Figure S1:**

Failure to isolate  $\text{Yb}^{3+}$  using self-triphosphorylation ribozymes from a library containing >300 ribozymes active with  $\text{Mg}^{2+}$ .

**Figure S2:**

Successful enrichment of  $\text{Yb}^{3+}$  using self-triphosphorylation ribozymes from a high-complexity library containing 150 randomized positions.

**Figure S3:**

Sequences and biochemical analysis of 23 ribozyme variants with different N20 inserts.

**Figure S4:**

Full data for the activity dependence of ribozyme 51 on the concentrations of cTnp and  $\text{Yb}^{3+}$ .

**Figure S5:**

Details on the analysis of individual mutations in ribozyme 51, including mutations in the loop positions 25-29 and three bulged adenosines at positions 36, 38, and 44.

**Figure S6:**

Test of ribozyme 51 to act in trans on a short RNA oligonucleotide.

**Figure S1**

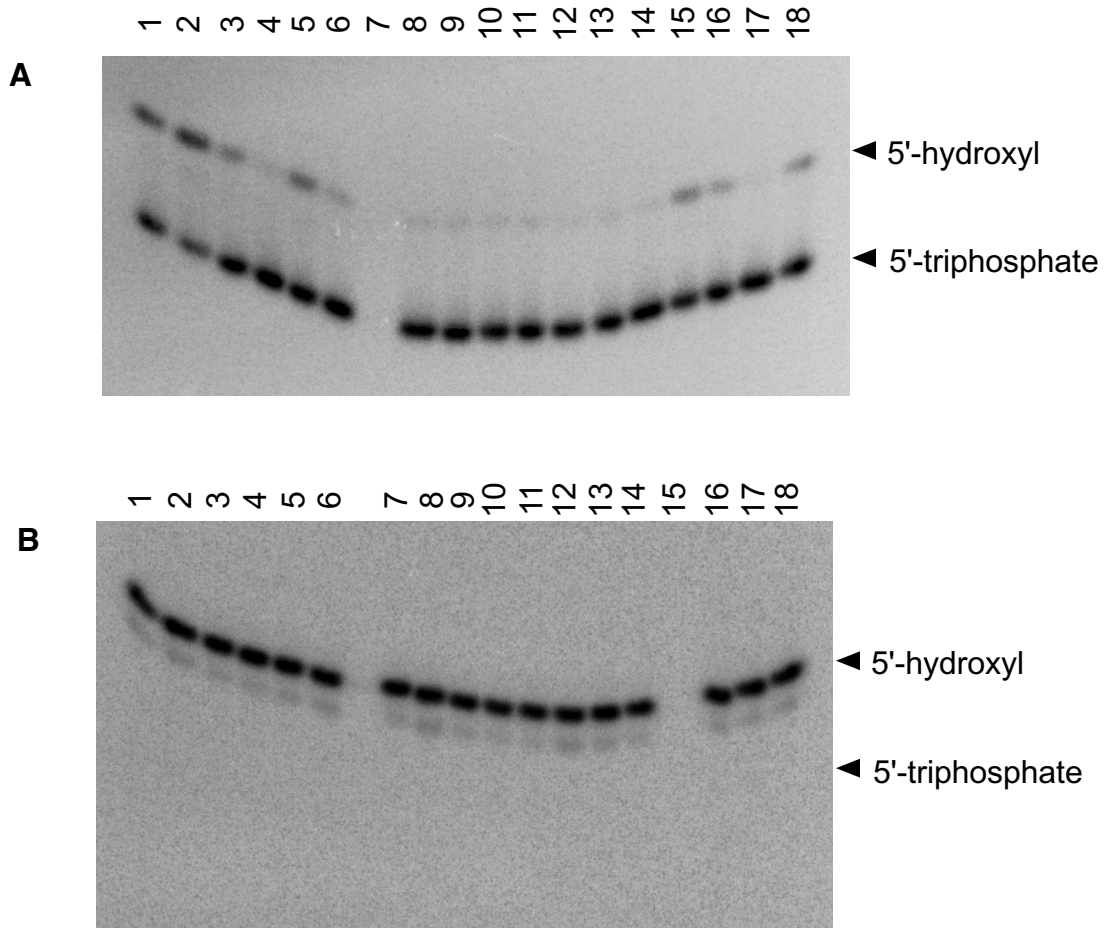

**Figure S1:** Activity of ribozyme clones (1-18) arbitrarily chosen from a library that was first selected for 8 selection rounds in the presence of  $Mg^{2+}$  (Moretti & Müller 2014), then for 5 selection rounds in the presence of  $Yb^{3+}$ . Shown are phosphorimages of radiolabeled RNAs separated by 20% PAGE. The assay was performed as described (Moretti & Müller, 2014). In short, ribozymes were radiolabeled internally by transcription with  $\alpha$ - $[^{32}P]$ ATP, reacted with cTnp, then processed with a catalytic DNA (DNAzyme). This DNAzyme cleaved the first 8 nucleotides of the ribozymes, generating an 8-nucleotide fragment that carried either a 5'-hydroxyl group or a 5'-triphosphate. Due to its additional 3.5 negative charges, the 5'-triphosphated RNA octanucleotide migrates faster than the 5'-hydroxyl octanucleotide. **(A)** Activity in the presence of  $Mg^{2+}$ . The sample for ribozyme 7 was lost during sample processing. **(B)** Activity of the same ribozyme clones in the presence of  $Yb^{3+}$ . Several lanes were not used due to malformed sample loading pockets. The sample for ribozyme 15 was lost during sample processing. The band migrating only slightly faster than the 5'-hydroxyl RNA in (B) is an n-1 product and not due to 5'-triphosphorylation.

**Figure S2**

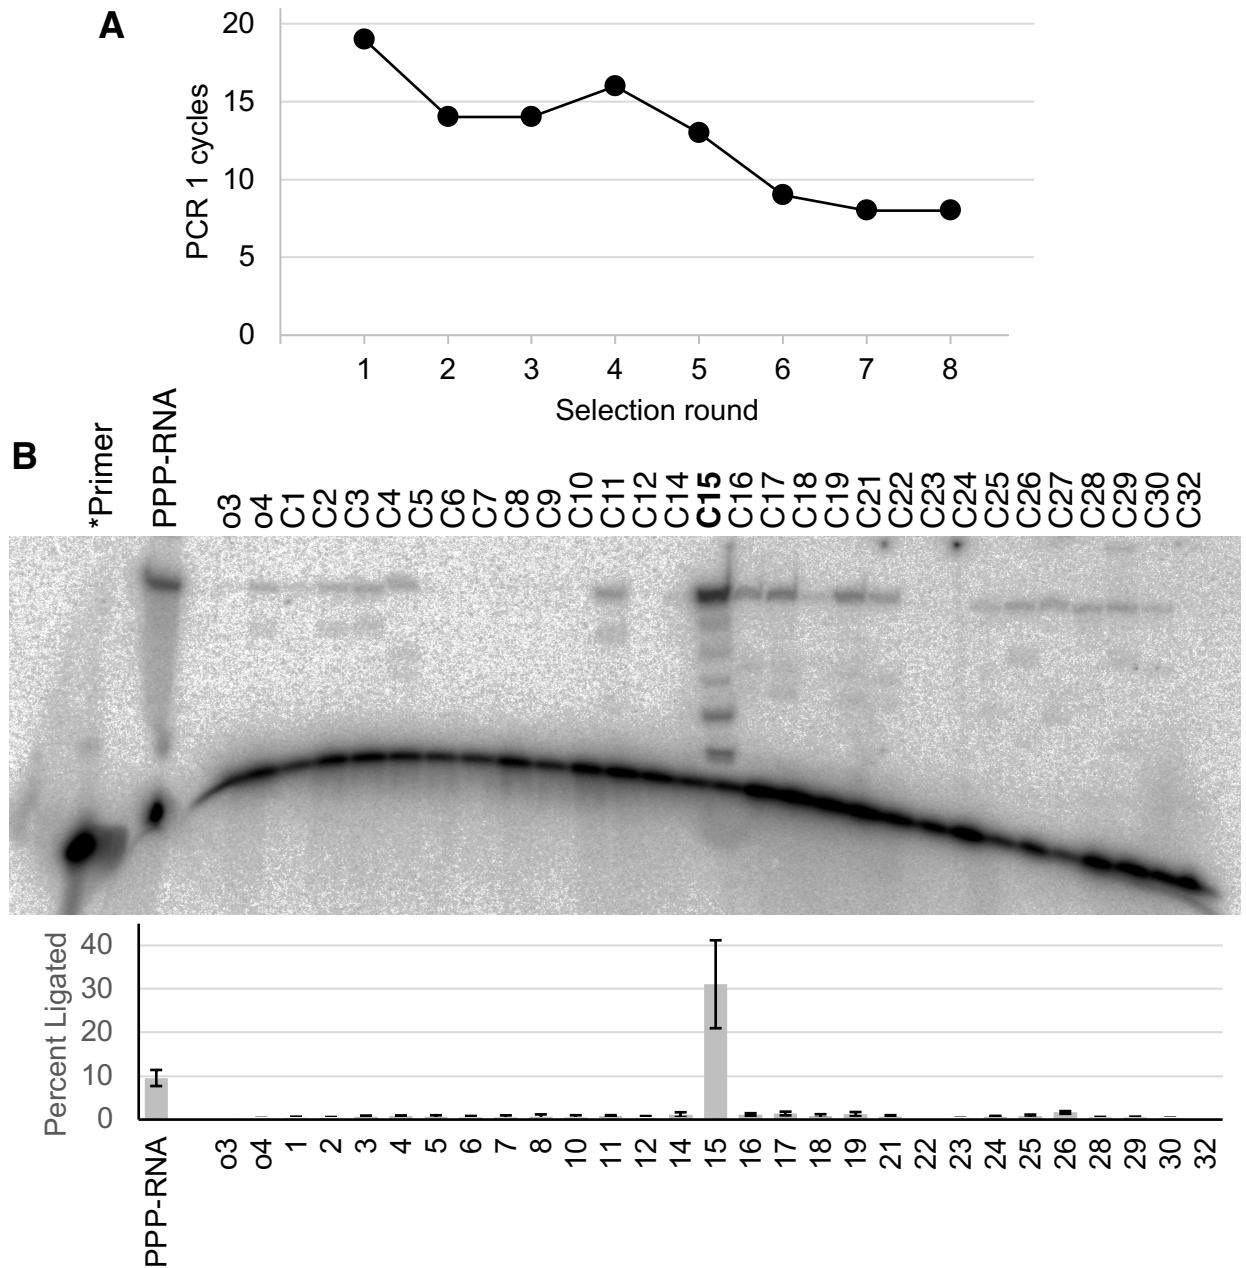

**Figure S2.** Detection of self-triphosphorylation activity in a library selected in the presence of  $\text{Yb}^{3+}$  from a completely randomized  $N_{150}$  sequence. **(A)** Number of PCR cycles during the selection procedure that were required to amplify selected reverse transcription products after the selection step. This cycle number was estimated from the intensity of PCR product bands on agarose gels of the correct size, with clear but not saturated intensity. **(B)** Biochemical activity of individual ribozyme clones that were arbitrarily chosen from the library after selection round 8. Clones o3 and o4 stem from an earlier selection round, while the 29 clones C1 to C32 stem from selection round 8. The ribozymes were incubated at room temperature for 3 hours in the presence of 6 mM  $\text{Yb}^{3+}$ , 6 mM cTnp, 50 mM Tris/HCl pH 7.3, and 55 mM NaCl. After ligation of 5'-triphosphorylated ribozymes to a radiolabeled primer using the R3C ligase ribozyme, products were separated by denaturing 20% PAGE and exposed to phosphorimager screens.

**Figure S3**

| Ribozyme | Activity (% ligated) | Standard deviation | Sequence                                                                                          |
|----------|----------------------|--------------------|---------------------------------------------------------------------------------------------------|
| 51       | 16.2                 | 4.5                | GAGACCGAGATGTTCCCTCAGGCCAGATTGGCTTTATACGACCACCGTTCACCTACCTTTGTTAAGTGTCTTGTGATCGCCAGTTAAGCTCCAGC   |
| 52       | 13.5                 | 5.2                | GAGACCGAGATGTTCCCTCAGGCCAGATTGGCTTTATACGACCACCGTTCACCTCTGTTGCTAGAAGTGATTTGTGATCGCCAGTTAAGCTCCAGC  |
| 42       | 12.6                 | 4.7                | GAGACCGAGATGTTCCCTCAGGCCAGATTGGCTTTATACGACCACCGTTCACGAGTGTGTCGACTCGCCCATGTGATCGCCAGTTAAGCTCCAGC   |
| 50       | 12.0                 | 2.8                | GAGACCGAGATGTTCCCTCAGGCCAGATTGGCTTTATACGACCACCGTTCACGGCTGCCTATGGTTACCCCGGTGATCGCCAGTTAAGCTCCAGC   |
| 48       | 10.9                 | 3.5                | GAGACCGAGATGTTCCCTCAGGCCAGATTGGCTTTATACGACCACCGTTCACAGGTCCACTTGCTGTATACCGTGTGATCGCCAGTTAAGCTCCAGC |
| 57       | 10.4                 | 5.7                | GAGACCGAGATGTTCCCTCAGGCCAGATTGGCTTTATACGACCACCGTTCACCTTGTACATAAGACGGGATGTGTGATCGCCAGTTAAGCTCCAGC  |
| 59       | 9.8                  | 6.4                | GAGACCGAGATGTTCCCTCAGGCCAGATTGGCTTTATACGACCACCGTTCACCGTTGCCTAATAGTGATACCGTGTGATCGCCAGTTAAGCTCCAGC |
| 53       | 9.4                  | 3.4                | GAGACCGAGATGTTCCCTCAGGCCAGATTGGCTTTATACGACCACCGTTCACAAATCATTTGTGGATGCCCTTGTGATCGCCAGTTAAGCTCCAGC  |
| 55       | 9.3                  | 3.8                | GAGACCGAGATGTTCCCTCAGGCCAGATTGGCTTTATACGACCACCGTTCACCGGATTGTTGATCTAGACGTTGTGATCGCCAGTTAAGCTCCAGC  |
| 4        | 9.0                  | 3.8                | GAGACCGAGATGTTCCCTCAGGCCAGATTGGCTTTATACGACCACCGTTCACGACTTCTCGAGGTTGTGGGGTGTGATCGCCAGTTAAGCTCCAGC  |
| 60       | 7.4                  | 4.4                | GAGACCGAGATGTTCCCTCAGGCCAGATTGGCTTTATACGACCACCGTTCACGTTGTGTTGCCACAGAACGTTGTGATCGCCAGTTAAGCTCCAGC  |
| 5        | 7.0                  | 2.0                | GAGACCGAGATGTTCCCTCAGGCCAGATTGGCTTTATACGACCACCGTTCACCTCTCCTCTTGGGTAGGTTGTGTGATCGCCAGTTAAGCTCCAGC  |
| 58       | 7.0                  | 4.1                | GAGACCGAGATGTTCCCTCAGGCCAGATTGGCTTTATACGACCACCGTTCACAGCCTTCGGGTCGTAGAAACGTGTGATCGCCAGTTAAGCTCCAGC |
| 54       | 6.4                  | 3.3                | GAGACCGAGATGTTCCCTCAGGCCAGATTGGCTTTATACGACCACCGTTCACGCGTTGGGTTGCGGTGTCGGGTGTGATCGCCAGTTAAGCTCCAGC |
| 9        | 6.3                  | 3.1                | GAGACCGAGATGTTCCCTCAGGCCAGATTGGCTTTATACGACCACCGTTCACCGTTATAGGTTGCCGATGTCTTGTGATCGCCAGTTAAGCTCCAGC |
| 65       | 5.7                  | 2.3                | GAGACCGAGATGTTCCCTCAGGCCAGATTGGCTTTATACGACCACCGTTCACAGTTTCCACGCGCTGTGTTGTGTGATCGCCAGTTAAGCTCCAGC  |
| 62       | 4.8                  | 2.5                | GAGACCGAGATGTTCCCTCAGGCCAGATTGGCTTTATACGACCACCGTTCACGGCTTTGATGGTTGCGGAAGGTGTGATCGCCAGTTAAGCTCCAGC |
| 70       | 3.5                  | 1.6                | GAGACCGAGATGTTCCCTCAGGCCAGATTGGCTTTATACGACCACCGTTCACATGTTTATGCACCATTCCGGTGTGATCGCCAGTTAAGCTCCAGC  |
| 67       | 3.1                  | 1.6                | GAGACCGAGATGTTCCCTCAGGCCAGATTGGCTTTATACGACCACCGTTCACCTGCAGGGATATGGCGTAGGGTGTGATCGCCAGTTAAGCTCCAGC |
| 73       | 2.2                  | 1.6                | GAGACCGAGATGTTCCCTCAGGCCAGATTGGCTTTATACGACCACCGTTCACFCAGTTTTCTGTGTACGTCGTGATCGCCAGTTAAGCTCCAGC    |
| 61       | 0.7                  | 0.2                | GAGACCGAGATGTTCCCTCAGGCCAGATTGGCTTTATACGACCACCGTTCACGTCCTCCAGCTCCCTGCTTTCGTGATCGCCAGTTAAGCTCCAGC  |
| 66       | 0.5                  | 0.1                | GAGACCGAGATGTTCCCTCAGGCCAGATTGGCTTTATACGACCACCGTTCACCCAAATAGACGAATTGGTTTGTGATCGCCAGTTAAGCTCCAGC   |
| 8        | 0.2                  | 0.1                | GAGACCGAGATGTTCCCTCAGGCCAGATTGGCTTTATACGACCACCGTTCACCTCGGGCGTGAAGTGTATTCTGTGATCGCCAGTTAAGCTCCAGC  |

**Figure S3.** Activity and sequences of 23 clones with an N20 sequence replacing nucleotides 54-158. Reactions were performed at 6 mM Yb<sup>3+</sup>, 6 mM cTnp, 50 mM HEPES/KOH pH 7.3, 150 mM NaCl, for 3 hours at 22°C. Each row describes one ribozyme clone, with the clone names in the left column. The rows are sorted based on their activity (second column), which lists the 'percent ligated' with the R3C ligase ribozyme, as a measure of its self-triphosphorylation activity. Values are averages of triplicate experiments, with the third column showing their standard deviation. The complete ribozyme sequences are listed in column four, with the portion of the randomized N20 sequence highlighted. Ribozyme 8 contains a nucleotide insertion (blue highlight), which may contribute to its low activity.

**Figure S4**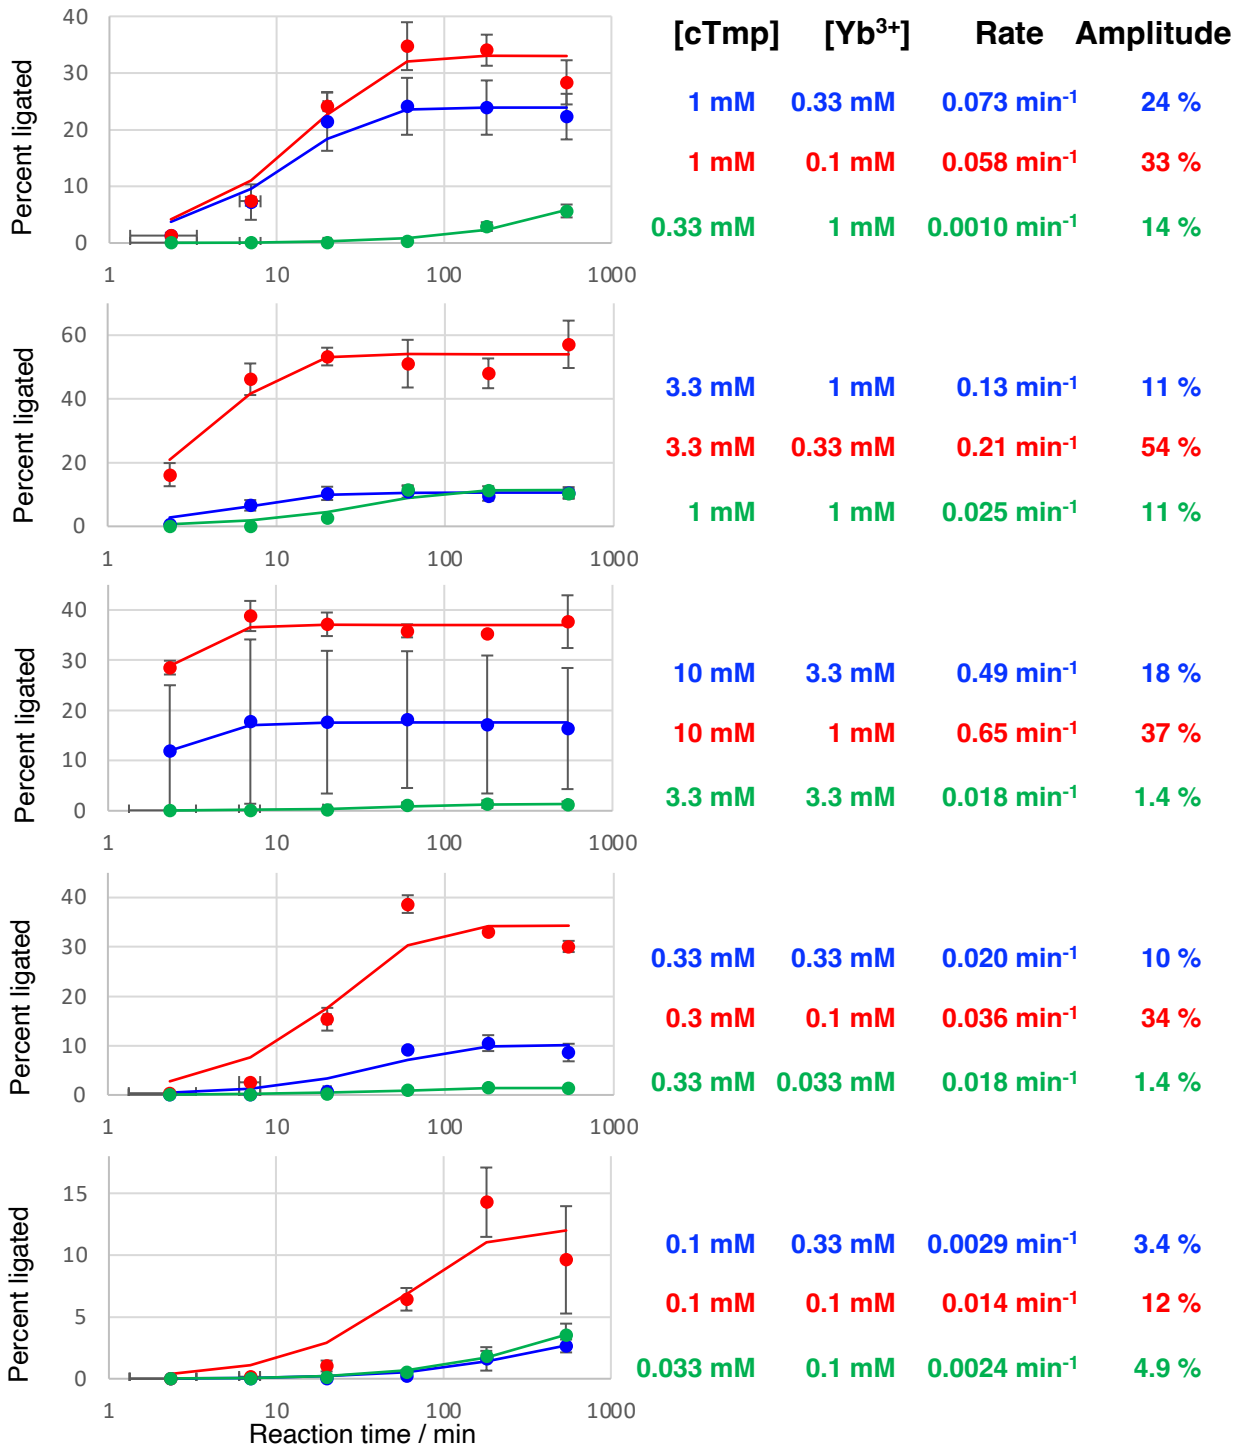

**Figure S4.** Kinetic data obtained by single exponential curve fitting to reactions with varying concentrations of Mg<sup>2+</sup> and cTmp. Only those combinations of cTmp concentration and Yb<sup>3+</sup> concentration that led to at least 1% of the ribozyme being ligated were used in this analysis to avoid problems stemming from a low signal-to-noise ratio. Data are averages from three experiments (filled circles), with error bars indicating standard deviations. The large error bars of the data set 10 mM cTmp / 3.3 mM Yb<sup>3+</sup> are not problematic for rate determination because each of the three individual experiments had a similar rate – only the amplitudes differed between the replicates. The concentrations of cTmp and Yb<sup>3+</sup> in all reactions is labeled next to each graph.

**Figure S5**

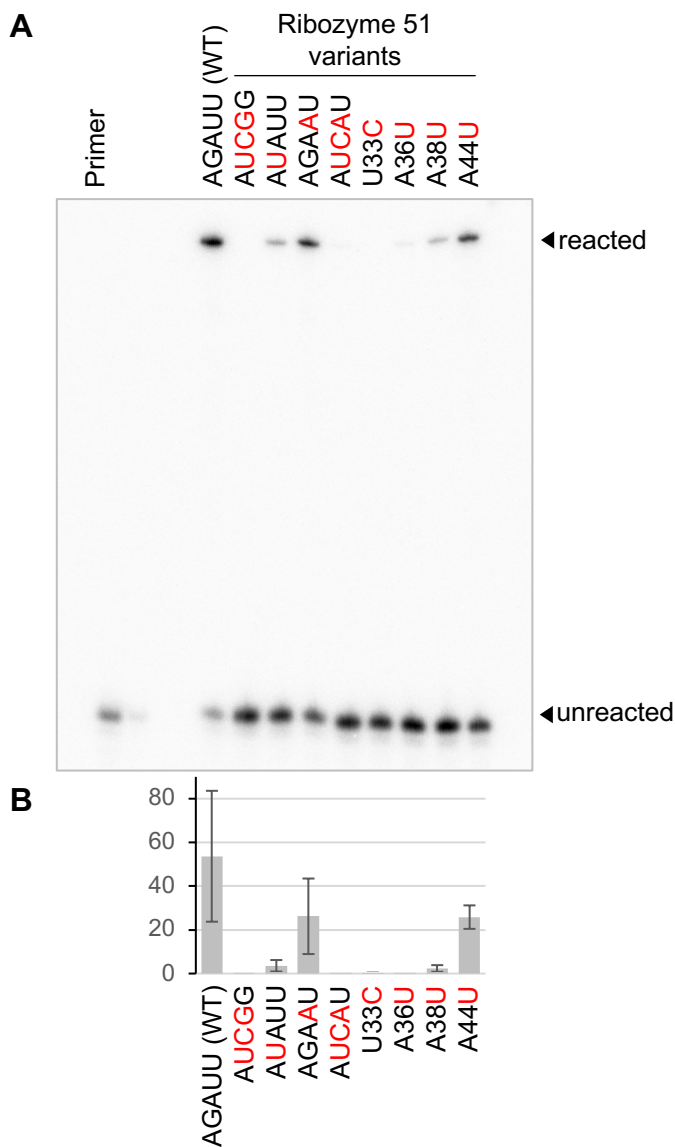

**Figure S5:** Supplementary details for Figure 7 in the main manuscript, on the activity of mutation variants of ribozyme 51 positions 25-29, and three bulged adenosines at positions 36, 38, and 44. **(A)** Phosphorimage of products from the ligation assay of ribozyme 51 variants with a 5'-[<sup>32</sup>P] radiolabeled 16mer RNA, after separation by denaturing 10% polyacrylamide gel electrophoresis. The position of the unreacted 16mer and the reacted, gel-shifted 111-mer are indicated. The fraction of shifted RNA reports on the fraction of shifted ribozyme because these two reaction partners were employed at equimolar concentrations. **(B)** Graph of the fraction of gel-shifted RNA 16-mer for the Wild-Type ribozyme 51 (loop sequence 25-29 of AGAUU), four variants with mutations in that loop sequence, and four variants with point mutations in the ribozyme. The mutated positions are highlighted in red. The mutation U33C converted a GU pair to a GC pair at the basis of the stem-loop containing the loop 25-29. While the effect of this mutation was surprisingly strong it was not described in the main manuscript because it did not fit the rationale of the storyline. Error bars are the standard deviations from three experiments. The large error bars of the WT and mutant AGAAU are not a concern because one replicate gave a high value for both variants, and another replicate gave a low value for both variants, therefore the ratio between both variants was similar.

**Figure S6**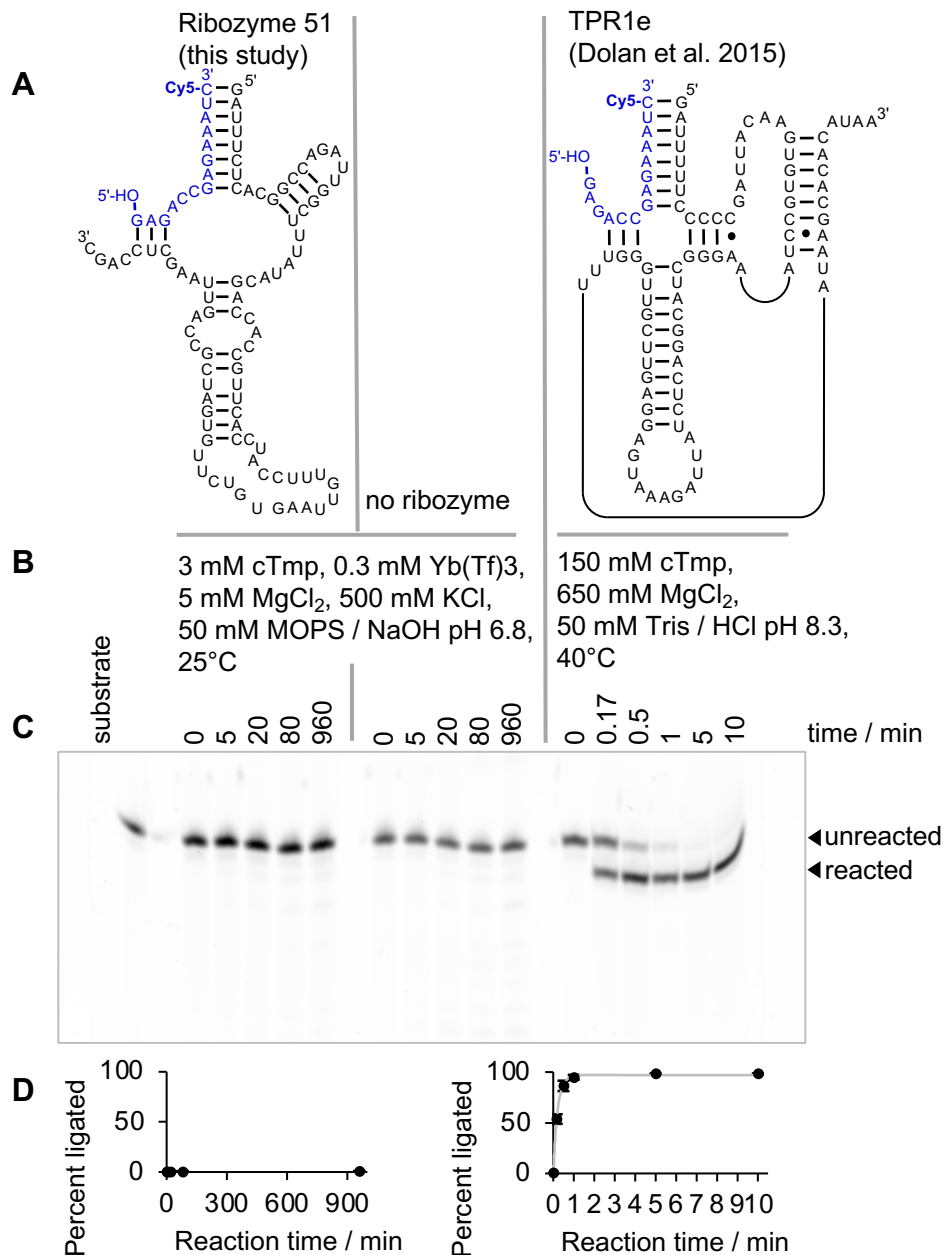

**Figure S6:** Test of the lanthanide-using ribozyme 51 for its potential to trans-triphosphorylate a short RNA. **(A)** The secondary structure of ribozyme 51 is shown, alongside the secondary structure of the ribozyme TPR1e, which was used as positive control. The short substrates used in trans are shown in blue, with a 3'-Cy5 label that was added using pCp-Cy5 (Jena Biosciences) and T4 RNA ligase. **(B)** Optimized reaction conditions for the lanthanide using ribozyme (left) and the Mg<sup>2+</sup> using ribozyme (right). **(C)** Scan of reaction products with excitation at 635 nm (Typhoon imager) that were separated by 7M urea 20% PAGE. Note that the weak, fuzzy band appearing with the lanthanide ribozyme was not due to triphosphorylation but due to degradation, as shown by an incubation of the substrate in the optimized reaction buffer without the lanthanide-using ribozyme. **(D)** Graphs showing the observed reaction kinetics of ribozyme 51, where no detectable signal was found after 16 hours of incubation, and TPR1e. The data from TPR1e were best fitted with a single-exponential function to a maximum of 97% and  $k_{OBS} = 4.7 \text{ min}^{-1}$ , which is close to the  $6.8 \text{ min}^{-1}$  observed for the corresponding cis-reacting TPR1e under the same reaction conditions (Dolan et al 2015). Symbols indicate averages from three experiments, and error bars are their standard deviations. If error bars are not visible they are smaller than the symbols.
